# Supplementary material for: High zT and Its Origin in Sb‐doped GeTe Single Crystals
Source: PubMed Central journal article supplement (PMC7740100; doi:10.1002/advs.202002494), 2020-11-06
Supplement: ADVS-7-2002494-s001.pdf [file ADVS-7-2002494-s001.pdf]

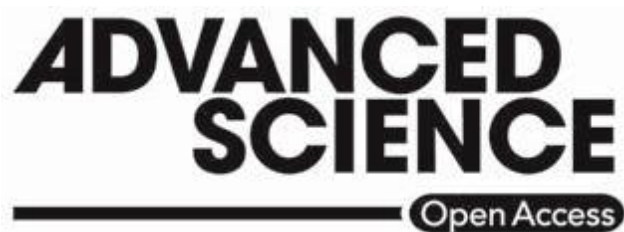

## Supporting Information

for *Adv. Sci.*, DOI: 10.1002/advs.202002494

High  $zT$  and its origin in Sb-doped GeTe single crystals

*Ranganayakulu K. Vankayala, Tian-Wey Lan, Prakash Parajuli, Fengjiao Liu, Rahul Rao, Shih Hsun Yu, Tsu-Lien Hung, Chih-Hao Lee, Shin-Ichiro Yano, Cheng-Rong Hsing, Duc-Long Nguyen, Cheng-Lung Chen, \* Sriparna Bhattacharya, \* Kuei-Hsien Chen, Min-Nan Ou, Oliver Rancu, Apparao M. Rao, and Yang-Yuan Chen\**

## Supporting Information

**High  $zT$  and its origin in Sb-doped GeTe single crystals**

*Ranganayakulu K. Vankayala, Tian-Wey Lan, Prakash Parajuli, Fengjiao Liu, Rahul Rao, Shih Hsun Yu, Tsu-Lien Hung, Chih-Hao Lee, Shin-Ichiro Yano, Cheng-Rong Hsing, Duc-Long Nguyen, Cheng-Lung Chen,\* Sriparna Bhattacharya,\* Kuei-Hsien Chen, Min-Nan Ou, Oliver Rancu, Apparao M. Rao, Yang-Yuan Chen,\**

R. K. Vankayala, Dr. T-W Lan, Dr. S. H. Yu, Dr. T-L Hung, Dr. C-L Chen,\* Dr. M-N Ou, Prof. Y-Y. Chen\*  
Institute of Physics, Academia Sinica, Taipei 11529, Taiwan, ROC  
Email: [aabbss@gate.sinica.edu.tw](mailto:aabbss@gate.sinica.edu.tw), [cheny2@phys.sinica.edu.tw](mailto:cheny2@phys.sinica.edu.tw)

R. K. Vankayala, Prof. C-H Lee

Dept. of Engineering and System Science, National Tsing Hua University, Hsinchu 30013, Taiwan, ROC

R. K. Vankayala

Taiwan International Graduate Program, Taipei 115, Taiwan, ROC

P. Parajuli, F. Liu, Dr. S. Bhattacharya,\* Oliver Rancu, Prof. A. M. Rao

Clemson Nanomaterials Institute, Department of Physics & Astronomy, Clemson University, Clemson, South Carolina 29634, USA

Email: [bbhatta@g.clemson.edu](mailto:bbhatta@g.clemson.edu)

Dr. Rahul Rao

Air Force Research Laboratory, WPAFB, Dayton, Ohio 45433, USA

Dr. S-I Yano

National Synchrotron Radiation Research Center, Hsinchu 30077, Taiwan, ROC

Dr. C-R Hsing, Dr. D-L Nguyen, Prof. K-H. Chen

Institute of Atomic and Molecular Sciences, Academia Sinica, Taipei 10617, Taiwan, ROC

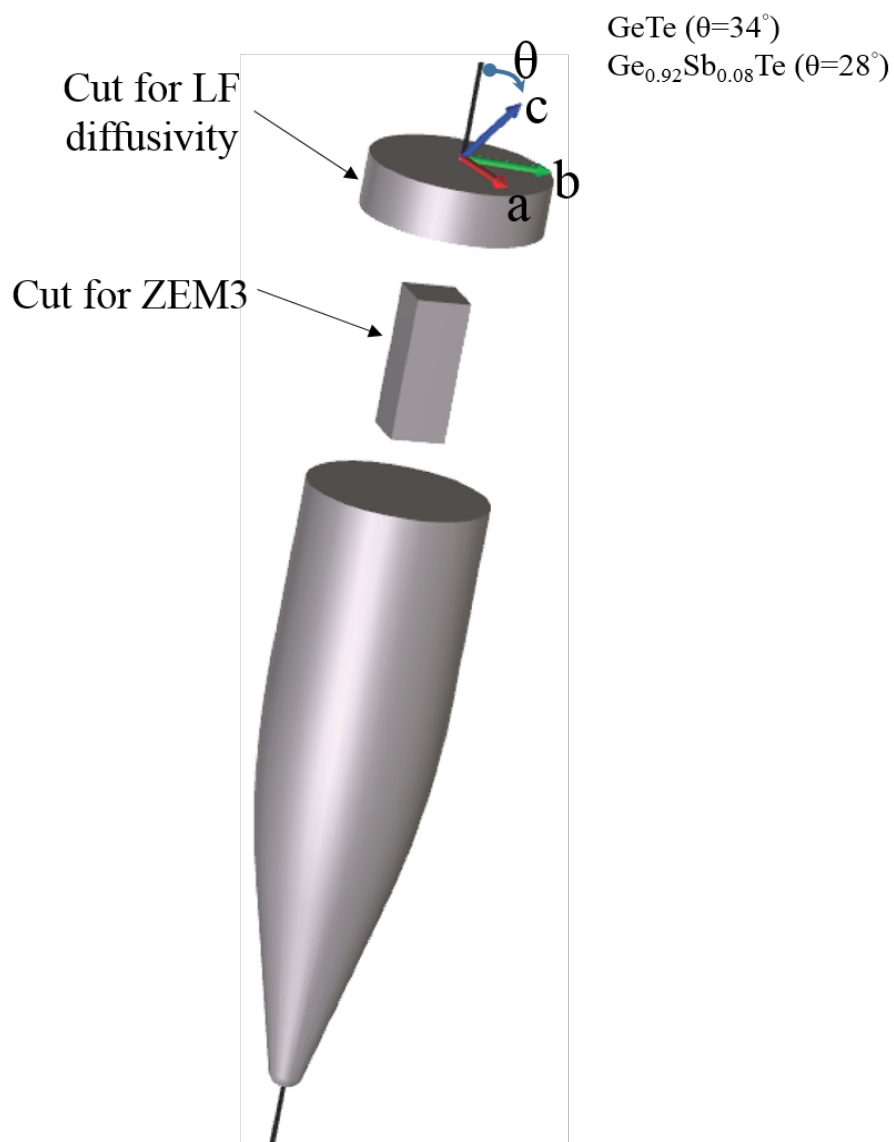

Fig. S1. A schematic showing the orientation of the cut samples used in this study. Here,  $a$ ,  $b$ ,  $c$  and  $\theta$  represents respectively the crystallographic axes and the tilt angle with respect to the normal.

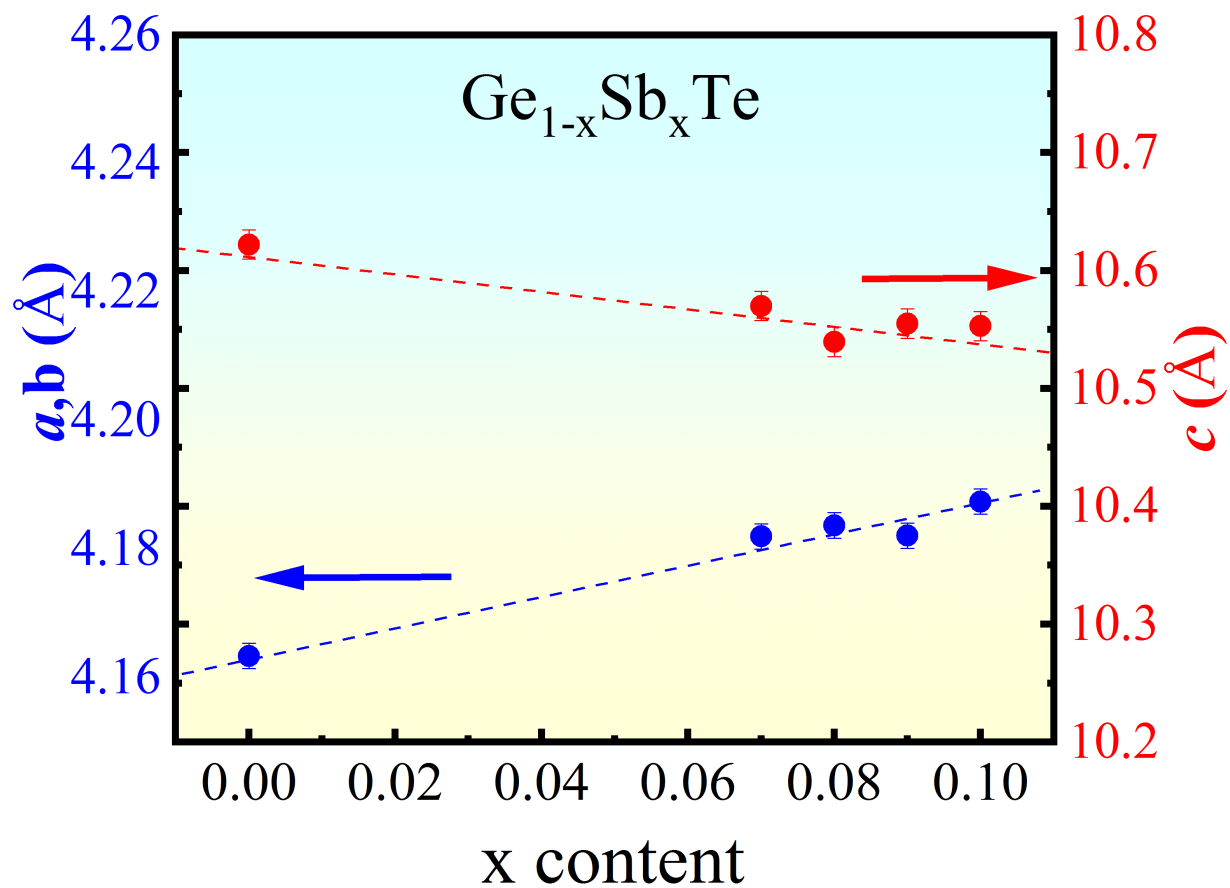

Fig. S2. Composition  $x$  dependent lattice parameters of GST deduced from the Rietveld refinement.

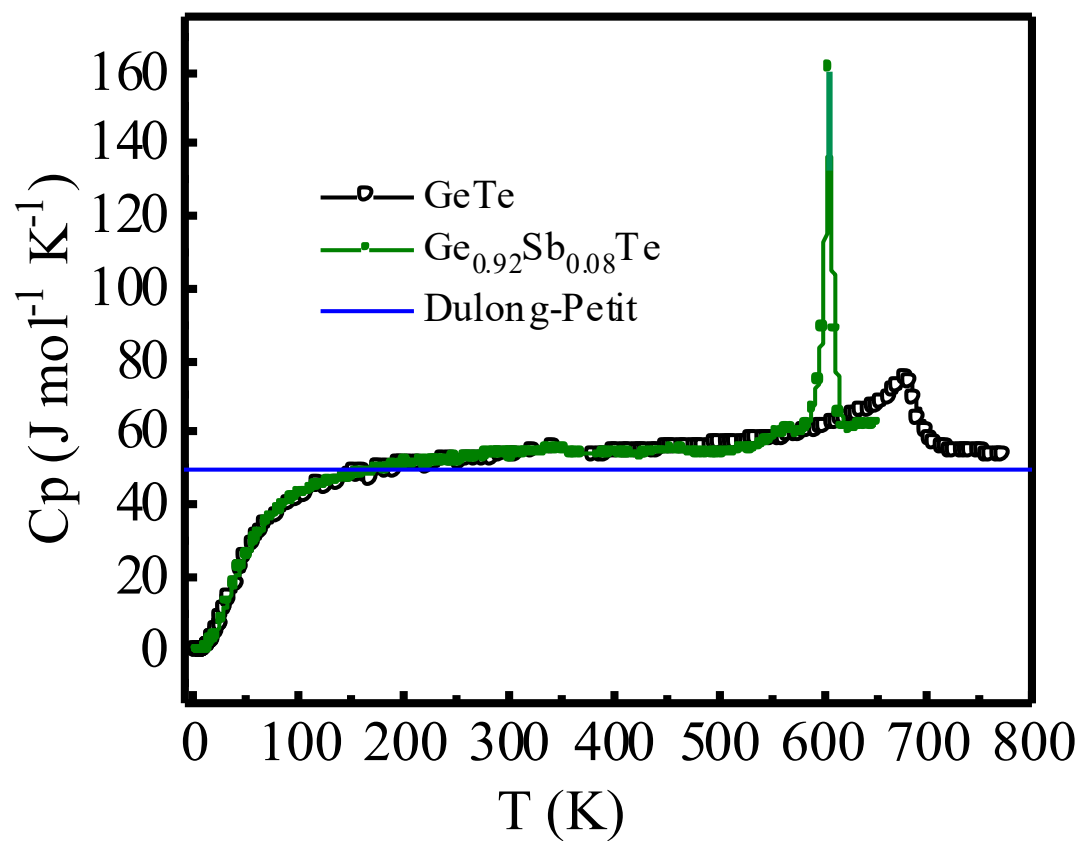

Figure S3: Specific heat capacity of GeTe and  $\text{Ge}_{0.92}\text{Sb}_{0.08}\text{Te}$  as a function of temperature measured using the PPMS (low temperature) and the DSC Q-100 (high temperature). A peak shift in GST indicates the shift of  $T_c$  towards a lower temperature with Sb-doping.

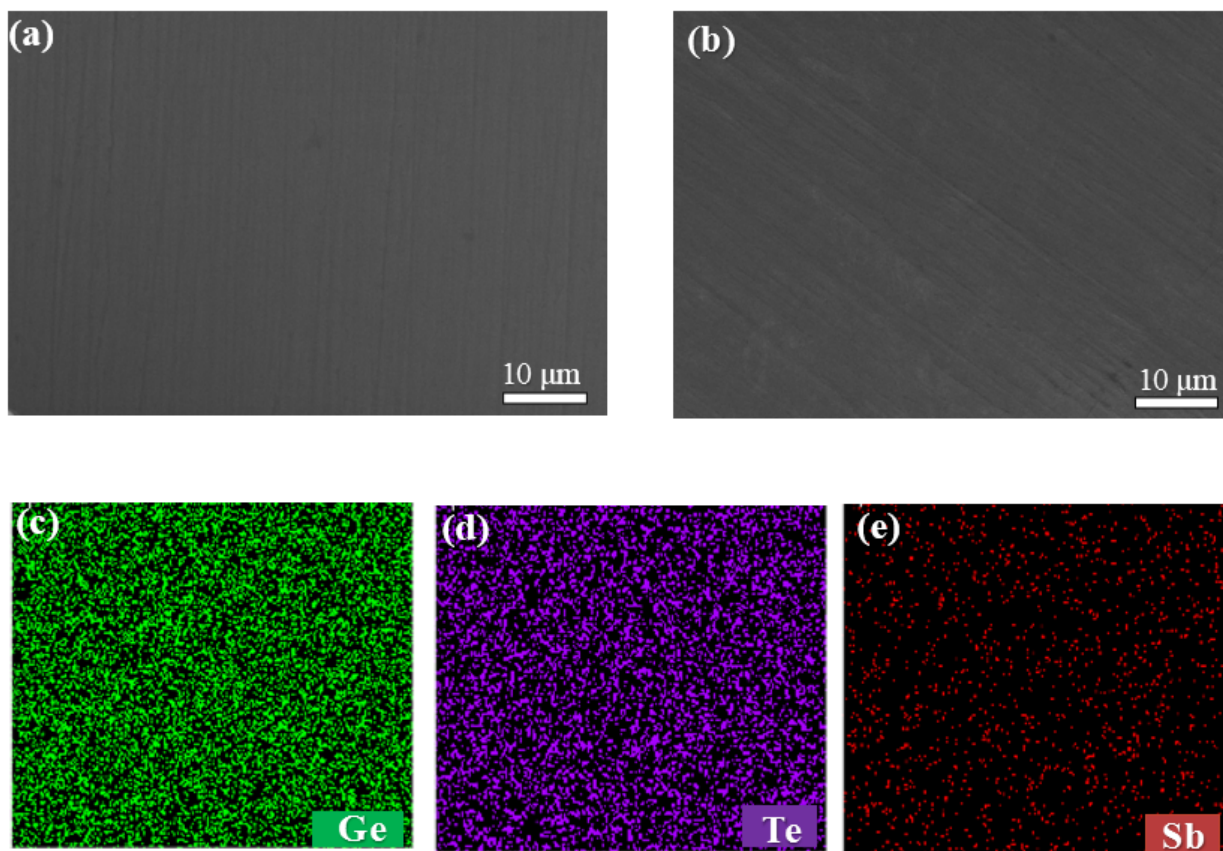

Figure S4: (a) & (b) SEM images of carefully polished surface samples of GeTe and Ge<sub>0.98</sub>Sb<sub>0.08</sub>Te. Few scratches due to polishing are evident. Panels (c) (d) & (e) represent the elemental mappings for Ge<sub>0.98</sub>Sb<sub>0.08</sub>Te obtained using EDAX.

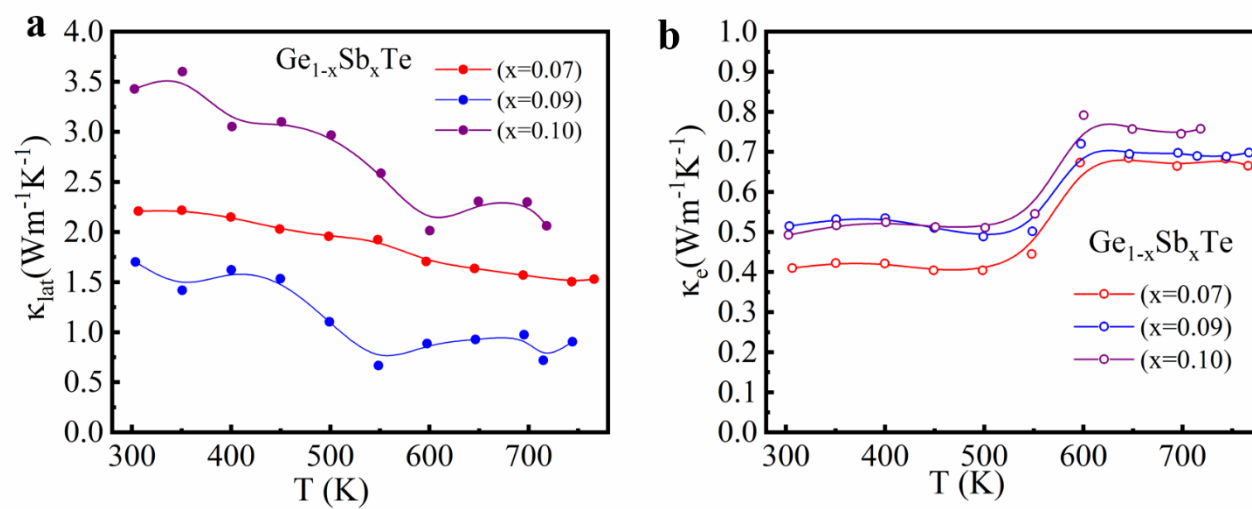

Figure S5: Lattice and electronic contribution to thermal conductivity of GST ( $x = 0.07, 0.09, 0.10$ ) crystals.

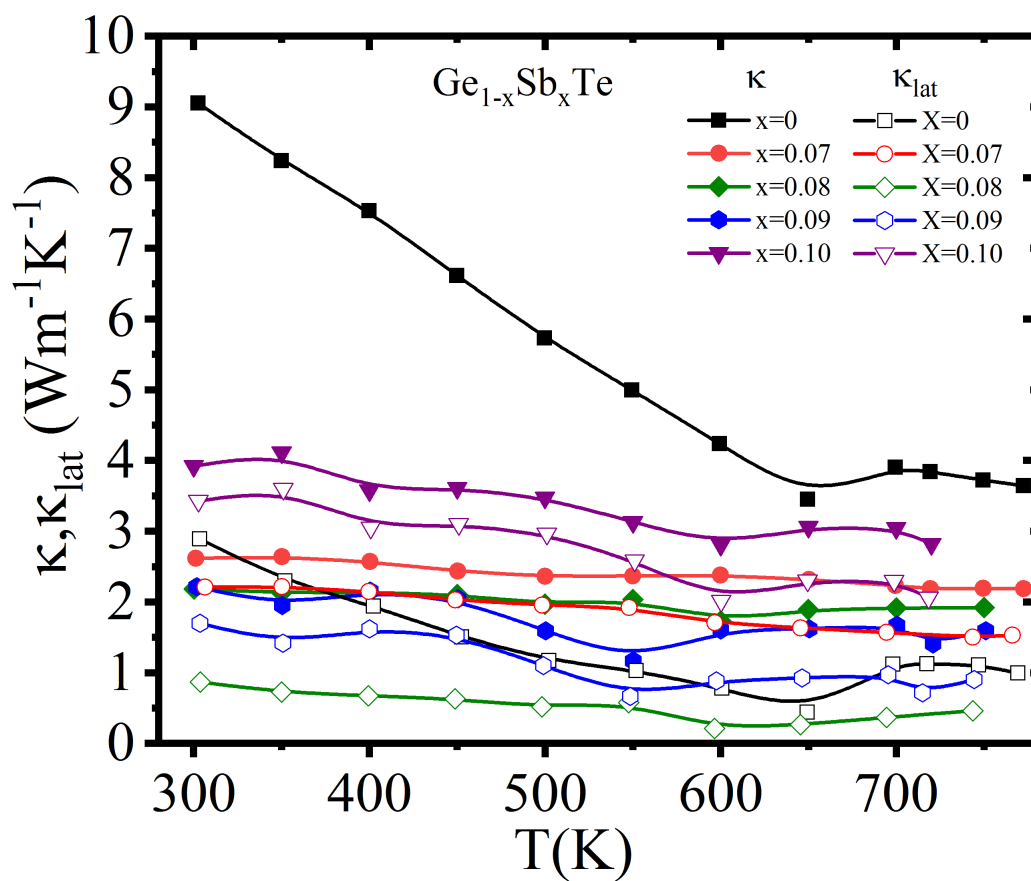

Figure S6: Total and lattice contribution to thermal conductivity of GST ( $x = 0, 0.07, 0.08, 0.09, 0.10$ ) crystals.



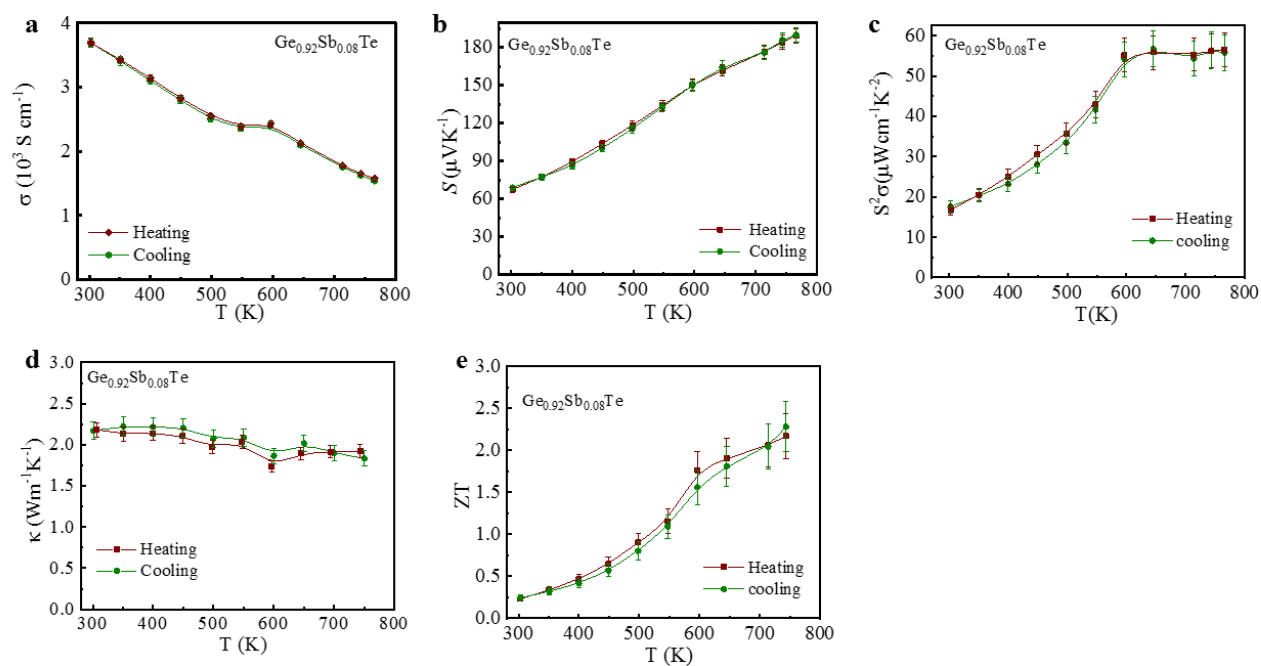

Figure S7: The reversibility of thermoelectric properties of  $\text{Ge}_{0.92}\text{Sb}_{0.08}\text{Te}$ . The heating and cooling data match well and are within the error bar region.

**Analysis of temperature dependent lattice thermal conductivity of  
Ge<sub>1-x</sub>Sb<sub>x</sub>Te (x=0, 0.08)**

**Simplification of Callaway's model (eqn. 1):**

$$\kappa_{lat} = \frac{k_B}{2\pi^2 v_s} \left(\frac{k_B T}{\hbar}\right)^3 \int_0^{\theta_D/T} \tau_c x^2 dx \quad (1)$$

$$\kappa_{lat} \approx \frac{k_B}{2\pi^2 v_s} \left(\frac{k_B T}{\hbar}\right)^3 \int_0^{\theta_D/T} \frac{x^2}{A\omega^4 + (B_U T e^{-\theta_D/3T} + B_H T^2)\omega^2} dx$$

$$\kappa_{lat} = \frac{k_B}{2\pi^2 v_s} \left(\frac{k_B T}{\hbar}\right)^3 \int_0^{\theta_D/T} \frac{x^2}{A \left(\frac{k_B T x}{\hbar}\right)^4 + (B_U T e^{-\theta_D/3T} + B_H T^2) \left(\frac{k_B T x}{\hbar}\right)^2} dx$$

$$\kappa_{lat} = \frac{\hbar}{2\pi^2 v_s A T} \int_0^{\theta_D/T} \frac{1}{x^2 + [x_0(T)]^2} dx$$

Where,  $x_0(T) = \sqrt{\frac{B_U T e^{-\theta_D/3T} + B_H T^2}{A \left(\frac{k_B T}{\hbar}\right)^2}}$

Solving above equation we get,

$$\kappa_{lat} = \frac{\hbar}{2\pi^2 v_s A T x_0(T)} \tan^{-1} \left[ \frac{\theta_D}{T x_0(T)} \right]. \quad (2)$$

To show the necessity of including a four phonon scattering process to describe the steeper fall of temperature dependent thermal conductivity of GeTe, initially only point defect scattering and three phonon Umklapp scattering were considered within equation (2) by deliberately setting  $B_H = 0$ . The resulting fit (as represented by the dashed trace in Fig. 5b) does not explain the experimental results. The inclusion of a four phonon scattering process yielded a much better fit as shown in Fig. 5b by the solid black trace. A similar approach was employed to describe the temperature profile of Sb doped GeTe data below the phase transition temperature, and both fits with (solid green trace) and without (dashed green trace) the 4-phonon scattering are in close agreement as shown in Fig. 5b.

**A) Calculated Parameters:**

**1) Pristine GeTe,**

Only Ge vacancies are considered while calculating point defects,

$$\tau_{PD}^{-1} = \frac{V}{4\pi v_s^3} \Gamma \omega^4$$

where,

$$\begin{aligned} \Gamma &= \Gamma_{MF} + \Gamma_{Strain} \\ &= \Gamma_{MF}(vacancy) + \Gamma_{MF}(doped) + \Gamma_{Strain} \\ &= N_V \left( \frac{\Delta M}{M} \right)^2 + \sum_i x_i \left[ \left( \frac{\Delta M_i}{M'} \right)^2 + \varepsilon \left( \frac{\Delta \delta_i}{\delta} \right)^2 \right] \\ &\approx N_V \left( \frac{\Delta M}{M} \right)^2 + x(1-x) \left( \frac{M_{Ge} - M_{Sb}}{M'} \right)^2 \end{aligned}$$

Here, the first term is from vacancy.  $N_V$  is the relative vacancy concentration and can be extracted from carrier concentration. Last term ( $\Gamma_{Strain}$ ) arises from strain field scattering effect and for the current purposes we can consider it to be negligible as radius of dopant and substituted atom is very similar. Vacancy contribution can be measured by considering formalism adopted from Klemens:<sup>[46]</sup>  $\frac{\Delta M}{M} = -\frac{M_a}{M} - 2$ . For vacancy only  $M$  is the average mass per atom of Ge and Te group.  $M_a$  is mass of missing atom.  $M'$  is the average mass of ternary cluster.

$$\begin{aligned} \Gamma &\approx N_V \left( -\frac{M_a}{M} - 2 \right)^2 + x(1-x) \left( \frac{M_{Ge} - M_{Sb}}{M'} \right)^2 \\ A &\approx \frac{V}{4\pi v_s^3} \left[ N_V \left( -\frac{M_a}{M} - 2 \right)^2 + x(1-x) \left( \frac{M_{Ge} - M_{Sb}}{M'} \right)^2 \right] \\ B_U &\approx \frac{\hbar \gamma^2}{M v_s^2 \theta_D} \end{aligned}$$

Here,  $V = 26.583 \times 10^{-30} \text{ m}^3$  volume per atom.  $\gamma = 1.7$  <sup>[58]</sup>

$$M_a = M_{Ge} = 72.63 \text{ amu}$$

$$M = \frac{M_{Ge} + M_{Te}}{2} = \frac{72.63 + 127.60}{2} = 100.115 \text{ amu}$$

$$M' = (1-x)M_{Ge} + xM_{Sb} + M_{Te}$$

$$M' = 0.92 \times 72.63 + 0.08 \times 121.76 + 127.60 = 204.1604 \text{ amu}$$

$$\left(-\frac{M_a}{M} - 2\right)^2 = \left(-\frac{M_{Ge}}{M} - 2\right)^2 = \left(-\frac{72.63}{100.115} - 2\right)^2 = 7.43$$

$$\left(\frac{M_{Ge} - M_{Sb}}{M'}\right)^2 = \left(\frac{72.63 - 121.76}{204.1604}\right)^2 = 0.0579$$

**1) Pristine GeTe**

$$N_V = n_p V = 8.04 \times 10^{26} \times 26.583 \times 10^{-30} = 0.0214 \text{ m}^{-3}, v_s = 1900 \text{ m/s} \text{ [35]}$$

$$A \approx \frac{V}{4\pi v_s^3} \left[ N_V \left(-\frac{M_a}{M} - 2\right)^2 \right] = \frac{26.583 \times 10^{-30}}{4\pi \times 1900^3} \times 0.0214 \times 7.43 = 4.90 \times 10^{-41} \text{ s}^3$$

$$B_U \approx \frac{\hbar \gamma^2}{M v_s^2 \theta_D} = \frac{1.0544 \times 10^{-34} \times 1.7^2}{100.115 \times 1.66 \times 10^{-27} \times 1900^2 \times 181} = 2.81 \times 10^{-18} \text{ sK}^{-1}$$

**2) Doped GeTe**

$$N_V = n_p V = 4 \times 10^{26} \times 26.583 \times 10^{-30} = 0.0106 \text{ m}^{-3}$$

$$A \approx \frac{V}{4\pi v_s^3} \left[ N_V \left(-\frac{M_a}{M} - 2\right)^2 + x(1-x) \left(\frac{M_{Ge} - M_{Sb}}{M'}\right)^2 \right]$$

$$= \frac{26.583 \times 10^{-30}}{4\pi \times 1900^3} \times [0.0106 \times 7.43 + 0.08 \times 0.92 \times 0.0579]$$

$$= 2.57 \times 10^{-41} \text{ s}^3$$

$$B_U \approx \frac{\hbar \gamma^2}{M v_s^2 \theta_D} = \frac{1.0544 \times 10^{-34} \times 1.7^2}{102.0802 \times 1.66 \times 10^{-27} \times 1900^2 \times 181} = 2.76 \times 10^{-18} \text{ sK}^{-1}$$

$$N_s = 8.9 \times 10^6 / m \text{ (microstructure, Fig. 1 e-i), } a_{lat} \sim 4.17 \times 10^{-10} \text{ m (Fig. S2)}$$

$$\tau_{SF}^{-1} = 0.7 \frac{a_{lat}^2 \gamma^2 N_s \omega^2}{v_s} \Rightarrow B_S = 0.7 \frac{a_{lat}^2 \gamma^2 N_s}{v_s}$$

$$= 0.7 \frac{(4.1719 \times 10^{-10})^2 \times 1.7^2 \times 8.9 \times 10^6}{1900} = 1.6465 \times 10^{-15} \text{ s}$$

Table S1: Fitting parameters used in Callaway's model, where  $A$  is the point defect scattering parameter, and  $B_U$  is three-phonon Umklapp scattering parameter and  $B_{SF}$  is the scattering parameter due to stacking faults, respectively. It should be mentioned that  $B_U$  essentially remains unchanged regardless of the inclusion or omission of  $B_{SF}$ . Moreover, as expected the values of  $A$  decreases when phonon scattering from stacking fault is also included (i.e.,  $B_{SF}$  is not = 0). Since a model fit to the experimental data with least number of fitting parameters is preferred, in the main manuscript we focused our discussion on column 3 in Table S1 (see text for more details).

| Scattering parameters     | Ge <sub>0.92</sub> Sb <sub>0.08</sub> Te<br>(with stacking fault) | Ge <sub>0.92</sub> Sb <sub>0.08</sub> Te<br>(without stacking fault) | Calculated             |
|---------------------------|-------------------------------------------------------------------|----------------------------------------------------------------------|------------------------|
| $A$ (s <sup>3</sup> )     | $2.81 \times 10^{-44}$                                            | $4.33 \times 10^{-41}$                                               | $2.57 \times 10^{-41}$ |
| $B_U$ (sK <sup>-1</sup> ) | $3.73 \times 10^{-17}$                                            | $2.24 \times 10^{-17}$                                               | $2.76 \times 10^{-18}$ |
| $B_{SF}$ (s)              | $6.80 \times 10^{-16}$                                            | -                                                                    | $1.65 \times 10^{-15}$ |

## Quantifying Anharmonicity of GeTe through temperature dependent Raman Spectroscopy

Bulk GeTe exhibits a rhombohedral structure ( $R3m$  space group with 2 atoms per unit cell) that undergoes a displacive phase transition to a cubic ( $Fm-3m$ ) structure at  $\sim 673$  K. It has 3 vibrational modes that can be represented as  $\Gamma = 2E_{2g} + A_{1u}$ . They are both Raman-active and IR-active because of the lack of inversion center and their eigenmodes are depicted in the figure below.<sup>[59],[60]</sup> We employed temperature-dependent polarized Raman spectroscopy data with  $z(xx)z$  and  $z(xy)z$  configurations from Ref<sup>[34]</sup>.

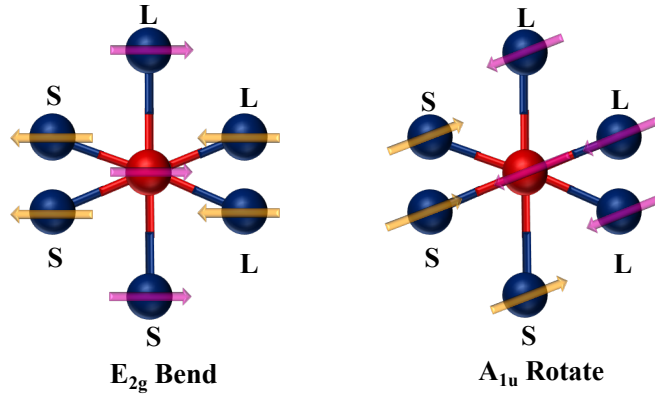

Figure S8a: Raman eigen modes of GeTe.

The anharmonicity co-efficient ( $\alpha_{R,j}$ ) for each Raman mode ( $\omega_j$ ) is given by<sup>[26],[61]</sup>

$$\alpha_{R,j} = -\frac{3nk_B}{E_T} \left[ \gamma \left( \frac{\Delta V}{V} \right) + \left( \frac{\Delta \omega_j}{\omega_j} \right) \right] \quad (S1)$$

where  $n$  is number of atoms in one mole of the GeTe,  $\gamma = 1.7$  is Gruneisen parameter of GeTe<sup>[58]</sup>  $E_T$  is thermal or vibration energy. The experimentally determined volume as a function of temperature is fitted using the following expression.<sup>[62]</sup>

$$V = V(0) + 9aR \int_0^T dT' \left( \frac{T'}{\theta_D} \right)^3 \int_0^{\theta_D/T'} \frac{e^{-x} x^4}{[e^x - 1]^2} dx \quad (S2)$$

where,  $\theta_D = 181$  K is the Debye temperature of GeTe, that yields,  $a = 0.000118 \text{ \AA}^3/J$  and  $V(0) = 159.509 \text{ \AA}^3$  (Fig. S7b).

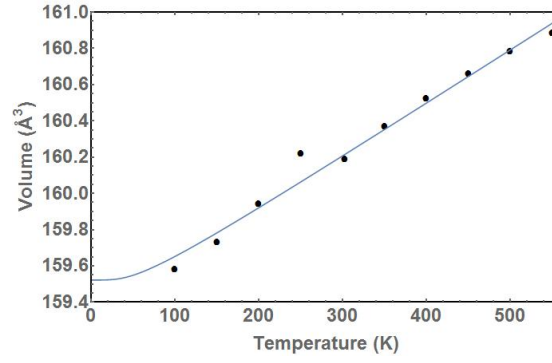

Figure S8b: Volume of GeTe unit cell as a function of temperature. The solid bullets represent experimental data and the fit through the data is described by equation (S2).

Using the extracted values of  $a$  and  $V(0)$  in equation (S2), we obtained  $\Delta V = V(550) - V(0) = 1.429\text{\AA}^3$ .

The experimental data for temperature dependent polarized Raman  $E_{2g}$  and  $A_{1u}$  modes from Ref. [34] were fitted (Fig. S8c) using identical three and four phonon decay approximation as,

$$\omega_j(T) = \omega_{oj} + \Delta\omega_j(T)_V + \Delta\omega_j(T)_{anh} \quad (\text{S3})$$

where,  $\omega_{oj}$  is the temperature independent harmonic frequency of the  $j$ th mode, and  $\Delta\omega_j(T)_V$  and  $\Delta\omega_j(T)_{anh}$  are the frequency shifts corresponding to quasiharmonic volume expansion and anharmonic phonon-phonon coupling. The quasiharmonic volume expansion contribution to frequency shifts is given by,

$$\Delta\omega_j(T)_V = \omega_{oj} \left[ \exp\left(-\gamma_{jT} \int_0^T \beta_T(T') dT'\right) - 1 \right] \quad (\text{S4})$$

where,  $\beta_T = (1/V) dV/dT$  is volume expansion coefficient.

The shift in the phonon frequency due to anharmonic phonon-phonon interaction is given by Eq. (S5), wherein a phonon of frequency  $\omega_j$  decays into two ( $\omega_m, m = 1, 2$ ) and three ( $\omega_n, n = 1, 2$ ) phonons respectively, [63]

$$\Delta\omega_j(T)_{anh} = A \left[ 1 + \sum_{m=1}^2 \frac{1}{e^{\hbar\omega_m/k_B T} - 1} \right] + B \left[ 1 + \sum_{n=1}^3 \left( \frac{1}{e^{\hbar\omega_n/k_B T} - 1} + \frac{1}{(e^{\hbar\omega_n/k_B T} - 1)^2} \right) \right] \quad (\text{S5})$$

We used identical phonon decay mode for three phonon process, whereas for four phonon process, with the help of phonon dispersion relation and phonon DOS,<sup>[31]</sup> a decay channel of  $160\text{ cm}^{-1} + 86\text{ cm}^{-1} \rightleftharpoons 123\text{ cm}^{-1} + 124\text{ cm}^{-1}$  out of many decay channels available by considering higher phonon is used to fit (Fig. S8c) the temperature dependent shifts in the frequency of both E and A modes. Two  $124\text{ cm}^{-1}$  and  $160\text{ cm}^{-1}$  optical phonons located in the L-W direction of phonon dispersion and  $86\text{ cm}^{-1}$  and  $123\text{ cm}^{-1}$  phonons are located at zone center gamma point were selected so that the decay mode satisfy both energy and momentum conservation. Interestingly, we found that the phonon decay in GeTe is dominated by a four-phonon process, unlike SnSe, where three phonon decay is the dominant mechanism. This is because GeTe exhibits a larger phonon energy gap as compared to SnSe where there were low hanging optical modes present.<sup>[45]</sup>

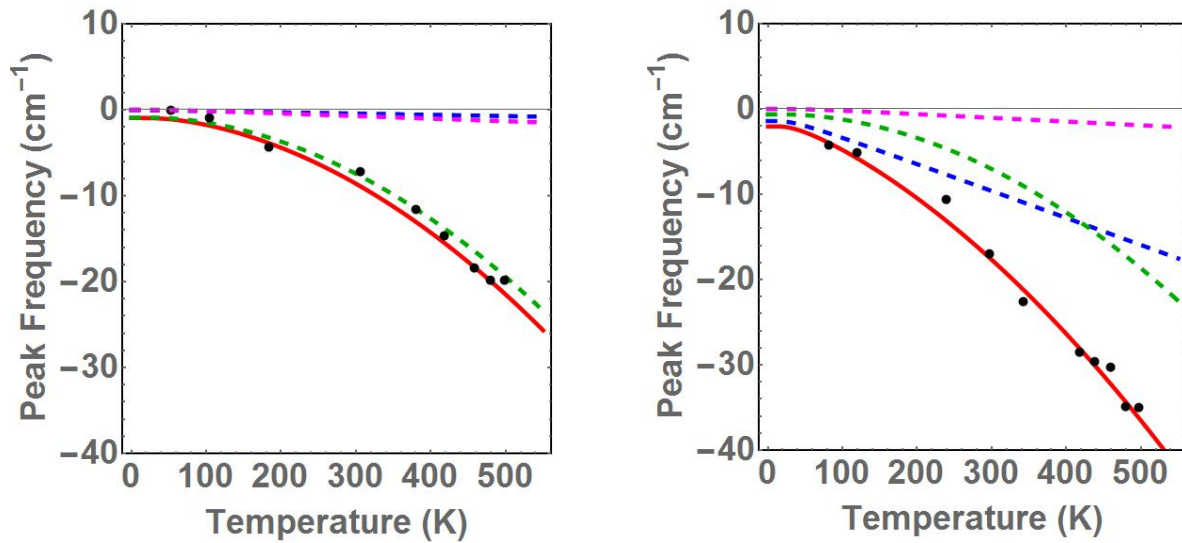

Figure S8c: Frequency shift plotted as a function of temperature for  $E_{2g}$  (left panel,  $86\text{ cm}^{-1}$ ) and  $A_{1u}$  (right panel,  $123\text{ cm}^{-1}$ ) modes. The 3-phonon (blue), 4-phonon (green), thermal expansion (magenta) contributions to the total shifts (red) are shown in the figure.
